# Supplementary material for: Fabrication of a novel hierarchical assembly of ZnO nanowires on WOx nanowhiskers for highly efficient field electron emission
Source: Royal Society of Chemistry journal article supplement (doi:10.1039/c1jm12224j), 2011-01-01
Supplement: c1jm12224j.pdf [file c1jm12224j.pdf]

## Supporting Information

# Fabrication of a novel hierarchical assembly of ZnO nanowires on WO<sub>x</sub> nanowhiskers for highly efficient field electron emission

Heejin Kim, Seongho Jeon, Mikung Lee, Junghan Lee, and Kijung Yong\*

Surface Chemistry Laboratory of Electronic Materials, Department of Chemical Engineering, Pohang  
University of Science and Technology (POSTECH), Pohang 790-784, Korea

\* Corresponding author: E-mail: [kyong@postech.ac.kr](mailto:kyong@postech.ac.kr)

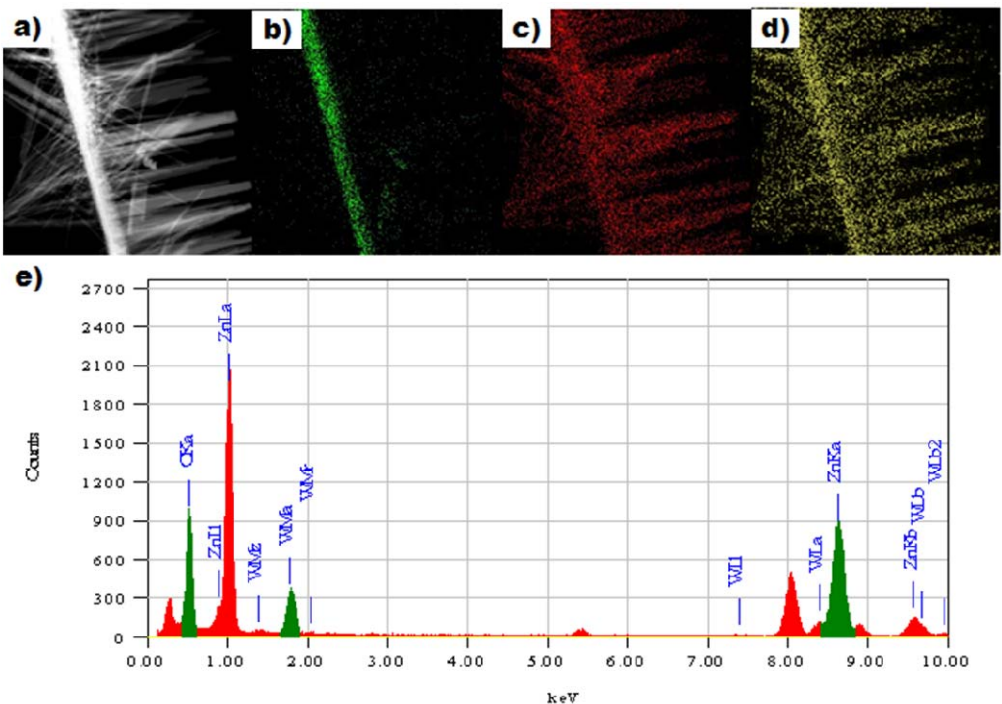

**Fig.S1.** TEM analysis of the hierarchical ZnO/WO<sub>x</sub> heteronanostructures (a) A high angular annual dark field (HAADF) scanning TEM image of single hierarchical ZnO/WO<sub>x</sub> sample and scanning TEM-EDX elemental mapping images of (b) W, (c) Zn, and (d) O. (e) Energy dispersive spectra(EDS) recorded from the hierarchical ZnO/WO<sub>x</sub> heteronanostructures.

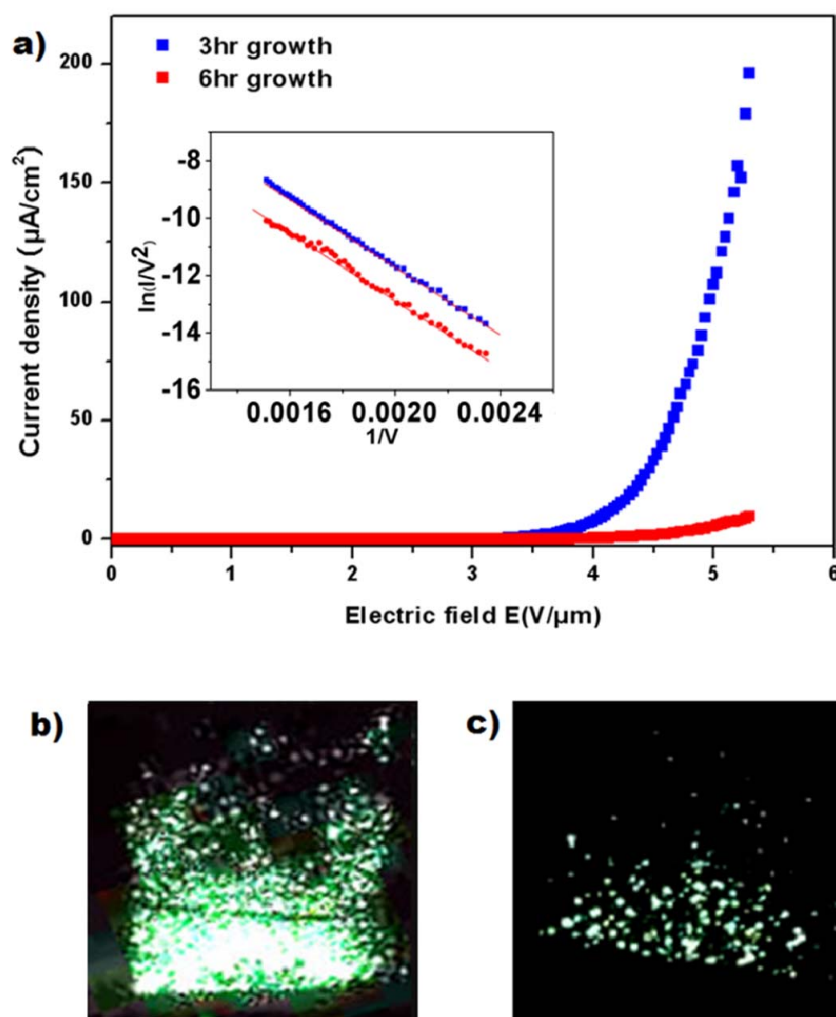

**Fig.S2.** Field-emission J-V curves: (a) ZnO nanowires/ $W_{18}O_{49}$  nanowhisker arrays on tungsten substrates with different growth times for the ZnO NWs (3 hr and 6 hr). The inset includes the FN plots of both samples. (b) and (c) depict the field emission images of samples grown in 3 hr and 6 hr, respectively.

Figure S2 depicts the field emission characteristics of the ZnO/ $WO_x$  hierarchical nanostructures with different ZnO growth times of 3 hr and 4.5 hr at 95 °C using 10 mM  $Zn(NO_3)_2$  with an ammonia solution. Although the ZnO nanowires were grown for longer time duration, the field emission current was decreased as observed from these results. The obtained turn-on field voltages at 10 mA/cm<sup>2</sup> were estimated to be 4.1 and 4.6 Vμm<sup>-1</sup> for the samples that were grown at 3 hr and 4.5 hr, respectively. The reasons for the observed degradation in emission properties may be ascribed to screen effects due to an increased density of ZnO nanowires. A longer growth time produced ZnO nanowires having longer lengths with higher densities on the  $WO_x$  nanowhiskers, as confirmed by the SEM images. The field emission images of both samples were taken at 0.8 kV (5.3 Vμm<sup>-1</sup>). As seen in the field emission images of figure S2(b, c), the 3hr grown sample exhibited a brighter and more uniform emission in comparison to the 4.5 hr grown sample.
